# Supplementary material for: Direct deoxygenation reaction of oxygenated model compounds by biomass pyrolysis on the Ni5P4(001) surface: a computational study
Source: Royal Society of Chemistry journal article supplement (doi:10.1039/d2se01521h), 2023-01-01
Supplement: d2se01521h1.pdf [file d2se01521h1.pdf]

## SUPPORTING INFORMATION

### Direct Deoxygenation Reaction of Biomass Pyrolysis Oxygenated Model Compounds on $Ni_5P_4(001)$ surface: Computational Study

Omer Elmutasim<sup>1,2</sup>, Kyriaki Polychronopoulou<sup>1,2,\*</sup>

<sup>1</sup>Mechanical Engineering Department, Khalifa University, P.O. Box 127788, Abu Dhabi, United Arab Emirates.

<sup>2</sup>Center for Catalysis and Separation (CeCaS), Khalifa University, P.O. Box 127788, Abu Dhabi, United Arab Emirates.

\*Corresponding author email: [kyriaki.polychrono@ku.ac.ae](mailto:kyriaki.polychrono@ku.ac.ae)

**Table S1:** Bader charges (Q, in |e|) for a phenol molecule in the gas phase ( $C_6H_6O$ )<sub>gas</sub> and molecularly adsorbed ( $C_6H_6O/Ni_5P_4$ ) on  $Ni_5P_4$  surface. Bader charge differences ( $C_6H_6O/Ni_5P_4 - (C_6H_6O)_{gas}$ ) are also tabulated.

| Atom | Gas-phase<br>$C_6H_6O$ | $C_6H_6O/Ni_5P_4$ | $C_6H_6O/Ni_5P_4 -$<br>$(C_6H_6O)_{gas}$ |
|------|------------------------|-------------------|------------------------------------------|
| C    | 5.99                   | 6.08              | 0.09                                     |
| C    | 5.98                   | 6.22              | 0.24                                     |
| C    | 6.08                   | 6.03              | -0.05                                    |
| C    | 6.06                   | 6.10              | 0.04                                     |
| C    | 5.48                   | 5.50              | 0.02                                     |
| C    | 6.00                   | 6.14              | 0.13                                     |

|              |              |              |             |
|--------------|--------------|--------------|-------------|
| H            | 0.97         | 0.87         | -0.09       |
| H            | 0.88         | 0.92         | 0.04        |
| H            | 0.92         | 0.92         | 0.00        |
| H            | 0.96         | 0.91         | -0.05       |
| H            | 0.91         | 0.91         | 0.00        |
| H            | 0.33         | 1.29         | 0.97        |
| O            | 9.12         | 9.20         | 0.08        |
| <b>Total</b> | <b>49.68</b> | <b>51.09</b> | <b>1.41</b> |

**Table S2:** Bader charges (Q, in |e|) for a guaiacol molecule in the gas phase ( $C_7H_8O_2$ )<sub>gas</sub> and molecularly adsorbed ( $C_7H_8O_2/Ni_5P_4$ ) on  $Ni_5P_4$  surface. Bader charge differences ( $C_7H_8O_2/Ni_5P_4 - (C_7H_8O_2)_{gas}$ ) are also tabulated.

| Atom | Gas-phase<br>( $C_7H_8O_2$ ) <sub>gas</sub> | $C_7H_8O_2/Ni_5P_4$ | $C_7H_8O_2/Ni_5P_4 - (C_7H_8O_2)_{gas}$ |
|------|---------------------------------------------|---------------------|-----------------------------------------|
| C    | 6.03                                        | 6.09                | 0.06                                    |
| C    | 6.12                                        | 6.04                | -0.09                                   |
| C    | 6.03                                        | 6.08                | 0.05                                    |
| C    | 5.49                                        | 5.46                | -0.03                                   |
| C    | 5.51                                        | 5.54                | 0.04                                    |
| C    | 6.01                                        | 6.13                | 0.12                                    |
| C    | 5.66                                        | 6.13                | 0.47                                    |
| H    | 0.94                                        | 0.92                | -0.02                                   |
| H    | 0.96                                        | 0.87                | -0.09                                   |
| H    | 0.90                                        | 0.87                | -0.03                                   |
| H    | 0.88                                        | 0.96                | 0.07                                    |
| H    | 0.32                                        | 0.34                | 0.02                                    |
| H    | 0.93                                        | 0.88                | -0.05                                   |
| H    | 0.90                                        | 0.89                | -0.01                                   |
| H    | 0.91                                        | 1.34                | 0.43                                    |

|              |              |              |             |
|--------------|--------------|--------------|-------------|
| O            | 9.26         | 9.43         | 0.17        |
| O            | 9.07         | 9.13         | 0.06        |
| <b>Total</b> | <b>65.94</b> | <b>67.09</b> | <b>1.16</b> |

a) R1

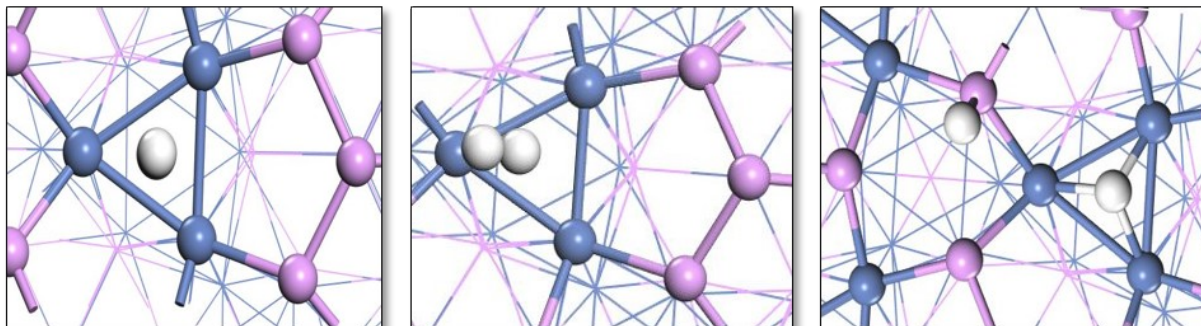

b) R5

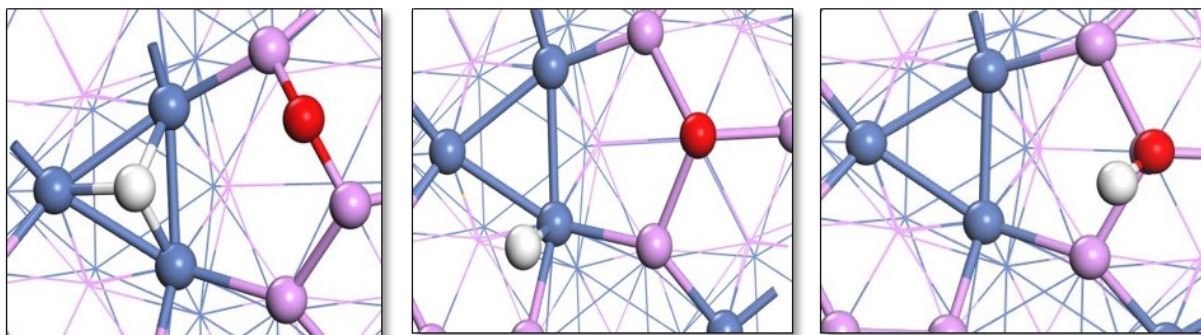

c) R6

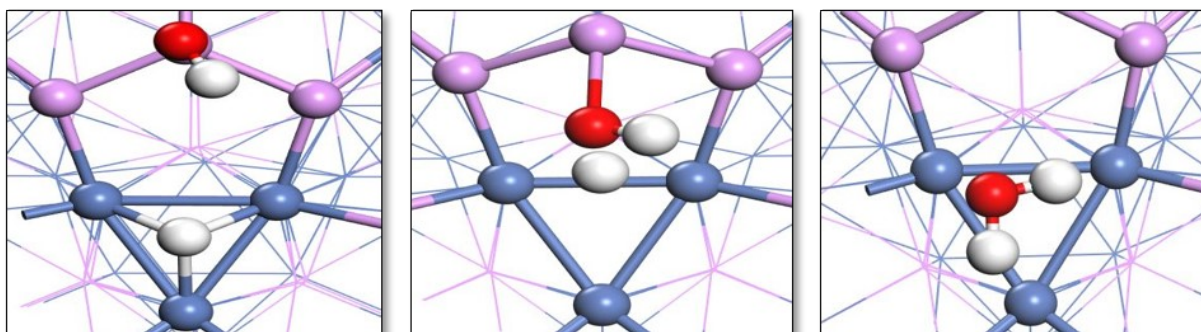

**Figure S1:** Top and side views of the initial state structure (left), the transition state (middle) and final state (right) for elementary steps R1, R5 and R6 related to Phenol DDO reaction on  $Ni_5P_4(001)$  surface; (Ni: blue; P: purple; C: black; O: red; and H: white).

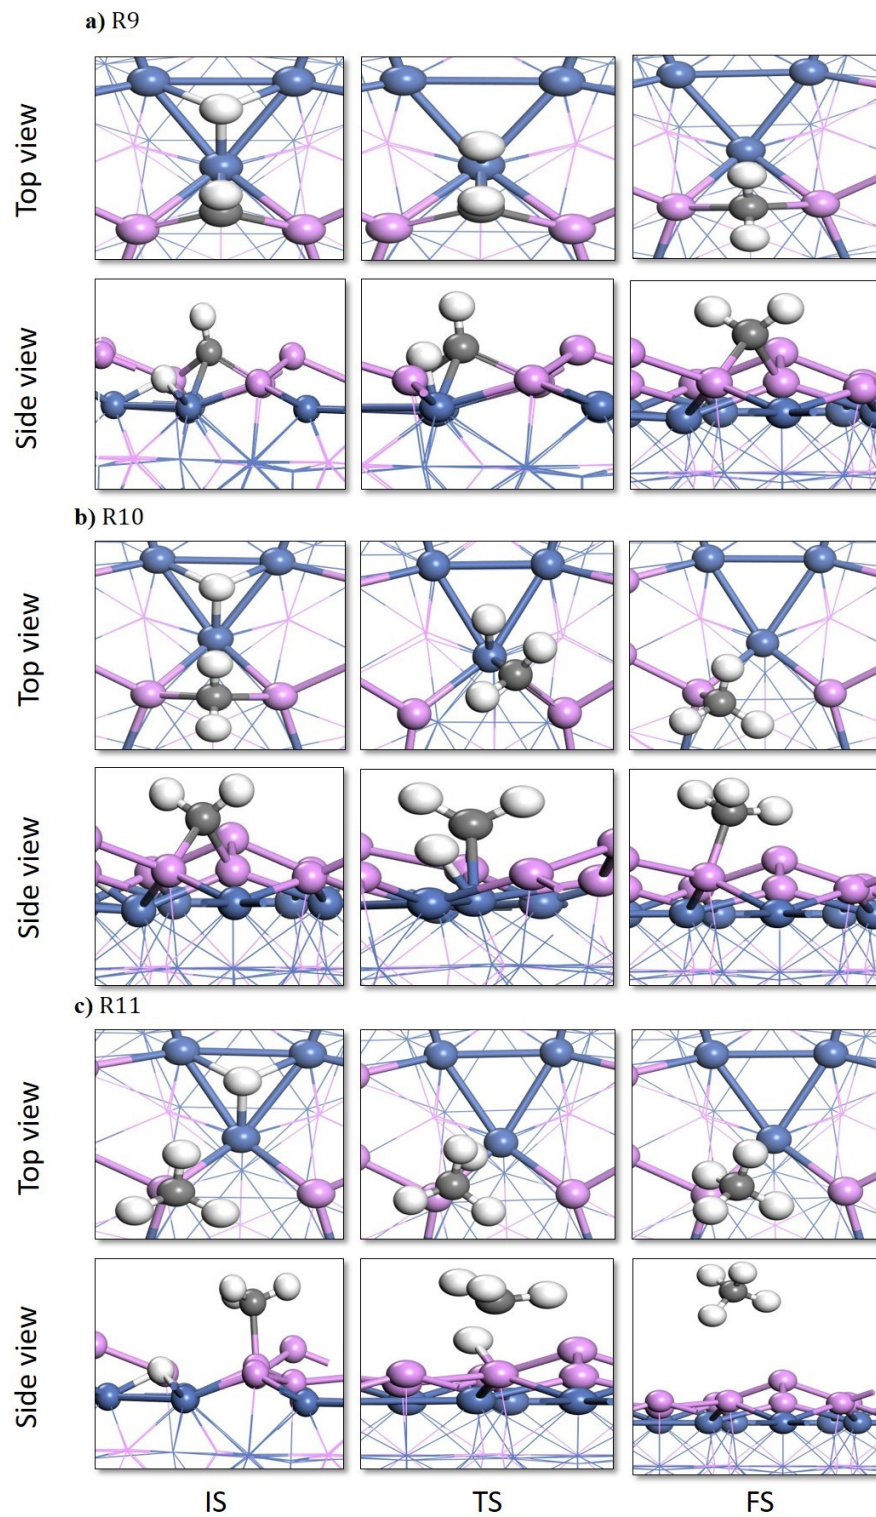

**Figure S2:** Top and side views of the initial state structure (left), the transition state (middle) and final state (right) for elementary steps R8, R9 and R10 pertained to  $CH_4$  formation on  $Ni_5P_4(001)$  surface; (Ni: blue; P: purple; C: black and H: white).

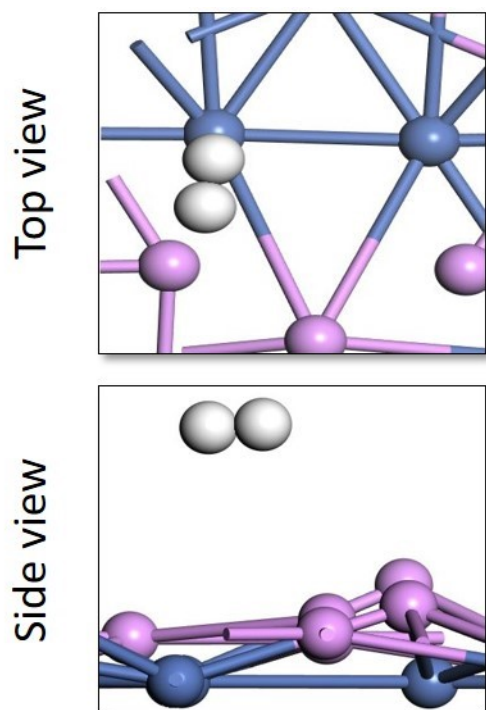

**Figure S3:** Top and side views of  $\text{H}_2$  molecule physisorbed at Ni-P bridge site on  $\text{Ni}_5\text{P}_4(001)$  surface; (Ni: blue; P: purple; C: black; O: red; and H: white).
